# Supplementary material
Source: publisher figshare collection journal article supplement (https://sage.figshare.com/ndownloader/files/32416802)
Supplement: Supplementary file 1 [file 32416802]

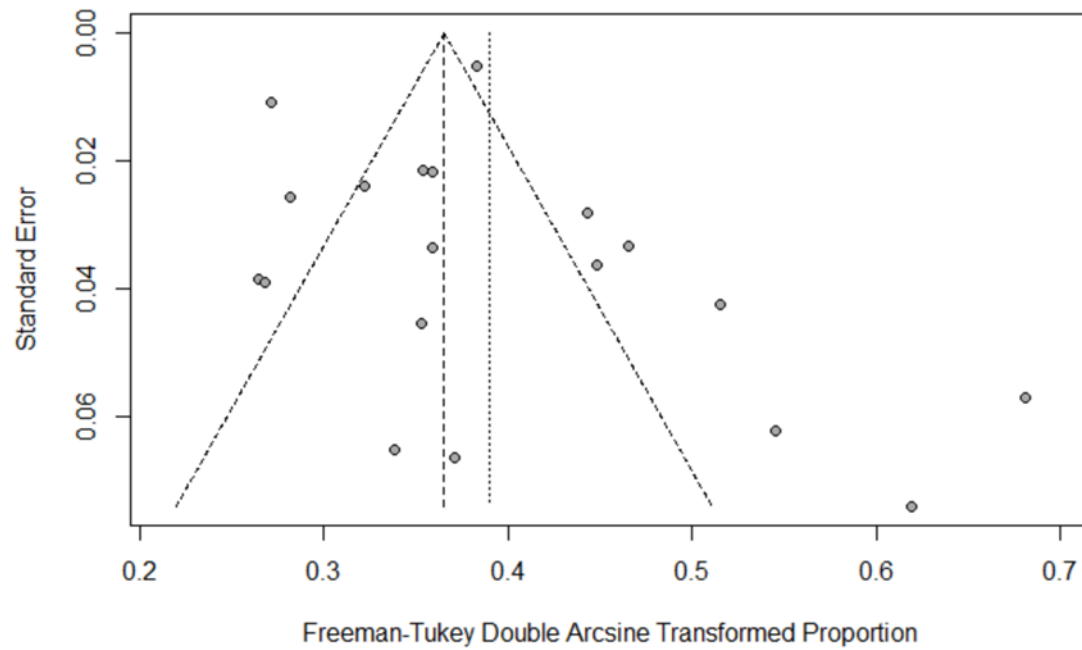

Note:

Peters' regression test:  $t = 2.5193$ ,  $df = 17$ ,  $p\text{-value} = 0.02206$  (asymmetry in funnel plot). Trim & fill analysis with 2 added studies: 0.1266 (0.1021-0.1533).

**Supplement 1.** Funnel plot
